# Supplementary material for: Reversible single crystal photochemistry and spin state switching in a metal-cyanide complex
Source: Research Square preprint supplement (doi:10.21203/rs.3.rs-5611691/v1), 2025-03-20

## checkCIF/PLATON report

Structure factors have been supplied for datablock(s) 10\_cr3\_a405nm\_a

THIS REPORT IS FOR GUIDANCE ONLY. IF USED AS PART OF A REVIEW PROCEDURE FOR PUBLICATION, IT SHOULD NOT REPLACE THE EXPERTISE OF AN EXPERIENCED CRYSTALLOGRAPHIC REFEREE.

No syntax errors found.      CIF dictionary      Interpreting this report

### Datablock: 10\_cr3\_a405nm\_a

---

Bond precision:      N- C = 0.0160 Å      Wavelength=0.68890

Cell:                      a=9.598 (4)                      b=9.710 (2)                      c=9.752 (3)  
                                alpha=66.10 (2)                      beta=87.91 (3)                      gamma=88.84 (3)

Temperature:              30 K

|                        | Calculated                | Reported                        |
|------------------------|---------------------------|---------------------------------|
| Volume                 | 830.4 (5)                 | 830.4 (5)                       |
| Space group            | P -1                      | P -1                            |
| Hall group             | -P 1                      | -P 1                            |
| Moiety formula         | C6 Mo N6, C N, 2(O), 4(K) | C7 K3.806 Mo N7 O2,<br>0.194(K) |
| Sum formula            | C7 K4 Mo N7 O2            | C7 K4 Mo N7 O2                  |
| Mr                     | 466.48                    | 466.48                          |
| Dx, g cm <sup>-3</sup> | 1.866                     | 1.866                           |
| Z                      | 2                         | 2                               |
| Mu (mm <sup>-1</sup> ) | 1.637                     | 1.627                           |
| F000                   | 450.0                     | 450.0                           |
| F000'                  | 447.80                    |                                 |
| h,k,lmax               | 11,12,12                  | 11,12,12                        |
| Nref                   | 3390                      | 3306                            |
| Tmin,Tmax              | 0.943,0.984               | 0.997,1.000                     |
| Tmin'                  | 0.937                     |                                 |

Correction method= # Reported T Limits: Tmin=0.997 Tmax=1.000  
AbsCorr = EMPIRICAL

Data completeness= 0.975                      Theta(max)= 25.496

R(reflections)= 0.0567 ( 2293)

wR2(reflections)=  
0.1444 ( 3306)

S = 0.996

Npar= 200



---

The following ALERTS were generated. Each ALERT has the format

**test-name\_ALERT\_alert-type\_alert-level.**

Click on the hyperlinks for more details of the test.

---

### Alert level B

PLAT306\_ALERT\_2\_B Isolated Oxygen Atom (H-atoms Missing ?) ..... 01B Check

**Author Response: An attempt to model the position of hydrogen atoms for the photoinduce state led to instability of the refinement.**

PLAT306\_ALERT\_2\_B Isolated Oxygen Atom (H-atoms Missing ?) ..... 02B Check

**Author Response: An attempt to model the position of hydrogen atoms for the photoinduce state led to instability of the refinement.**

---

### Alert level C

PLAT029\_ALERT\_3\_C \_diffn\_measured\_fraction\_theta\_full value Low . 0.976 Why?  
PLAT042\_ALERT\_1\_C Calc. and Reported MoietyFormula Strings Differ Please Check  
Calc: C6 Mo N6, C N, 2(O), 4(K)  
Rep.: C7 K3.806 Mo N7 O2, 0.194(K)  
PLAT250\_ALERT\_2\_C Large U3/U1 Ratio for <U(i,j)> Tensor(Resd 1) 2.1 Note  
PLAT911\_ALERT\_3\_C Missing FCF Refl Between Thmin & STh/L= 0.600 72 Report

|     |    |    |     |    |    |     |    |    |     |    |    |     |    |    |     |    |    |
|-----|----|----|-----|----|----|-----|----|----|-----|----|----|-----|----|----|-----|----|----|
| 10  | 0  | 0, | 11  | 0  | 0, | -11 | 1  | 0, | -10 | 1  | 0, | -9  | 1  | 0, | 11  | 1  | 0, |
| -11 | 2  | 0, | -10 | 2  | 0, | -11 | 3  | 0, | -10 | 3  | 0, | -6  | 6  | 0, | 5   | 7  | 0, |
| 10  | -3 | 1, | 9   | -2 | 1, | 10  | -2 | 1, | 11  | -2 | 1, | 9   | -1 | 1, | 10  | -1 | 1, |
| 11  | -1 | 1, | -11 | 0  | 1, | -10 | 0  | 1, | 9   | 0  | 1, | 10  | 0  | 1, | 11  | 0  | 1, |
| -11 | 1  | 1, | -10 | 1  | 1, | 10  | 1  | 1, | 11  | 1  | 1, | -11 | 2  | 1, | -11 | 3  | 1, |
| -5  | 7  | 1, | 5   | -6 | 2, | 10  | -3 | 2, | -8  | -2 | 2, | 10  | -2 | 2, | -9  | -1 | 2, |
| 9   | -1 | 2, | 10  | -1 | 2, | 11  | -1 | 2, | 9   | 0  | 2, | 10  | 0  | 2, | 11  | 0  | 2, |
| 10  | 1  | 2, | 11  | 1  | 2, | -11 | 2  | 2, | 11  | 2  | 2, | 10  | -2 | 3, | -8  | -1 | 3, |
| 9   | -1 | 3, | 10  | -1 | 3, | 10  | 0  | 3, | 11  | 0  | 3, | 10  | 1  | 3, | 11  | 1  | 3, |
| 11  | 2  | 3, | -7  | -1 | 4, | -8  | 0  | 4, | 10  | 0  | 4, | 9   | 1  | 4, | 9   | 2  | 4, |
| -7  | 0  | 5, | 8   | 1  | 5, | 8   | 2  | 5, | 8   | 3  | 5, | 4   | 8  | 5, | 7   | 2  | 6, |
| 7   | 3  | 6, | 7   | 4  | 6, | 6   | 5  | 6, | 6   | 6  | 6, | 2   | 0  | 8, | 3   | 0  | 8, |

PLAT971\_ALERT\_2\_C Check Calcd Resid. Dens. 0.93Ang From MolB 1.68 eA-3  
PLAT975\_ALERT\_2\_C Check Calcd Resid. Dens. 1.05Ang From O2B . 0.83 eA-3  
PLAT975\_ALERT\_2\_C Check Calcd Resid. Dens. 1.05Ang From O1B . 0.77 eA-3  
PLAT975\_ALERT\_2\_C Check Calcd Resid. Dens. 1.04Ang From O2B . 0.63 eA-3  
PLAT976\_ALERT\_2\_C Check Calcd Resid. Dens. 0.40Ang From O1B . -0.45 eA-3

---

### Alert level G

ABSMU01\_ALERT\_1\_G Calculation of \_exptl\_absorpt\_correction\_mu  
not performed for this radiation type.  
PLAT040\_ALERT\_1\_G No H-atoms in this Carbon Containing Compound .. Please Check  
PLAT178\_ALERT\_4\_G The CIF-Embedded .res File Contains SIMU Records 2 Report  
PLAT188\_ALERT\_3\_G A Non-default SIMU Restraint Value has been used 0.0010 Report  
PLAT188\_ALERT\_3\_G A Non-default SIMU Restraint Value has been used 0.0010 Report  
PLAT302\_ALERT\_4\_G Anion/Solvent/Minor-Residue Disorder (Resd 5) 100% Note



|                   |                                                       |          |         |             |
|-------------------|-------------------------------------------------------|----------|---------|-------------|
| PLAT302_ALERT_4_G | Anion/Solvent/Minor-Residue Disorder (Resd            | 9)       | 100%    | Note        |
| PLAT304_ALERT_4_G | Non-Integer Number of Atoms in .....                  | (Resd 5) | 0.81    | Check       |
| PLAT304_ALERT_4_G | Non-Integer Number of Atoms in .....                  | (Resd 9) | 0.19    | Check       |
| PLAT790_ALERT_4_G | Centre of Gravity not Within Unit Cell: Resd.         | #        | 3       | Note        |
|                   | O                                                     |          |         |             |
| PLAT790_ALERT_4_G | Centre of Gravity not Within Unit Cell: Resd.         | #        | 4       | Note        |
|                   | O                                                     |          |         |             |
| PLAT790_ALERT_4_G | Centre of Gravity not Within Unit Cell: Resd.         | #        | 5       | Note        |
|                   | K                                                     |          |         |             |
| PLAT790_ALERT_4_G | Centre of Gravity not Within Unit Cell: Resd.         | #        | 8       | Note        |
|                   | K                                                     |          |         |             |
| PLAT790_ALERT_4_G | Centre of Gravity not Within Unit Cell: Resd.         | #        | 9       | Note        |
|                   | K                                                     |          |         |             |
| PLAT802_ALERT_4_G | CIF Input Record(s) with more than 80 Characters      |          | 2       | Info        |
| PLAT883_ALERT_1_G | Absent Datum for _atom_sites_solution_primary ..      |          |         | Please Do ! |
| PLAT912_ALERT_4_G | Missing # of FCF Reflections Above STh/L= 0.600       |          | 12      | Note        |
| PLAT941_ALERT_3_G | Average HKL Measurement Multiplicity .....            |          | 3.9     | Low         |
| PLAT969_ALERT_5_G | The 'Henn et al.' R-Factor-gap value .....            |          | 1.213   | Note        |
|                   | Predicted wR2: Based on SigI**2 11.91 or SHELX Weight |          | 14.50   |             |
| PLAT984_ALERT_1_G | The K-f' = 0.2029 Deviates from the B&C-Value         |          | 0.1927  | Check       |
| PLAT984_ALERT_1_G | The Mo-f' = -1.8879 Deviates from the B&C-Value       |          | -1.8622 | Check       |
| PLAT985_ALERT_1_G | The K-f" = 0.2500 Deviates from the B&C-Value         |          | 0.2361  | Check       |
| PLAT985_ALERT_1_G | The Mo-f" = 0.6654 Deviates from the B&C-Value        |          | 0.6534  | Check       |

---

0 **ALERT level A** = Most likely a serious problem - resolve or explain  
 2 **ALERT level B** = A potentially serious problem, consider carefully  
 9 **ALERT level C** = Check. Ensure it is not caused by an omission or oversight  
 23 **ALERT level G** = General information/check it is not something unexpected

8 ALERT type 1 CIF construction/syntax error, inconsistent or missing data  
 8 ALERT type 2 Indicator that the structure model may be wrong or deficient  
 5 ALERT type 3 Indicator that the structure quality may be low  
 12 ALERT type 4 Improvement, methodology, query or suggestion  
 1 ALERT type 5 Informative message, check

---



---



It is advisable to attempt to resolve as many as possible of the alerts in all categories. Often the minor alerts point to easily fixed oversights, errors and omissions in your CIF or refinement strategy, so attention to these fine details can be worthwhile. In order to resolve some of the more serious problems it may be necessary to carry out additional measurements or structure refinements. However, the purpose of your study may justify the reported deviations and the more serious of these should normally be commented upon in the discussion or experimental section of a paper or in the "special\_details" fields of the CIF. checkCIF was carefully designed to identify outliers and unusual parameters, but every test has its limitations and alerts that are not important in a particular case may appear. Conversely, the absence of alerts does not guarantee there are no aspects of the results needing attention. It is up to the individual to critically assess their own results and, if necessary, seek expert advice.

### **Publication of your CIF in IUCr journals**

A basic structural check has been run on your CIF. These basic checks will be run on all CIFs submitted for publication in IUCr journals (*Acta Crystallographica*, *Journal of Applied Crystallography*, *Journal of Synchrotron Radiation*); however, if you intend to submit to *Acta Crystallographica Section C* or *E* or *IUCrData*, you should make sure that full publication checks are run on the final version of your CIF prior to submission.

### **Publication of your CIF in other journals**

Please refer to the *Notes for Authors* of the relevant journal for any special instructions relating to CIF submission.



Datablock 10\_cr3\_a405nm\_a - ellipsoid plot

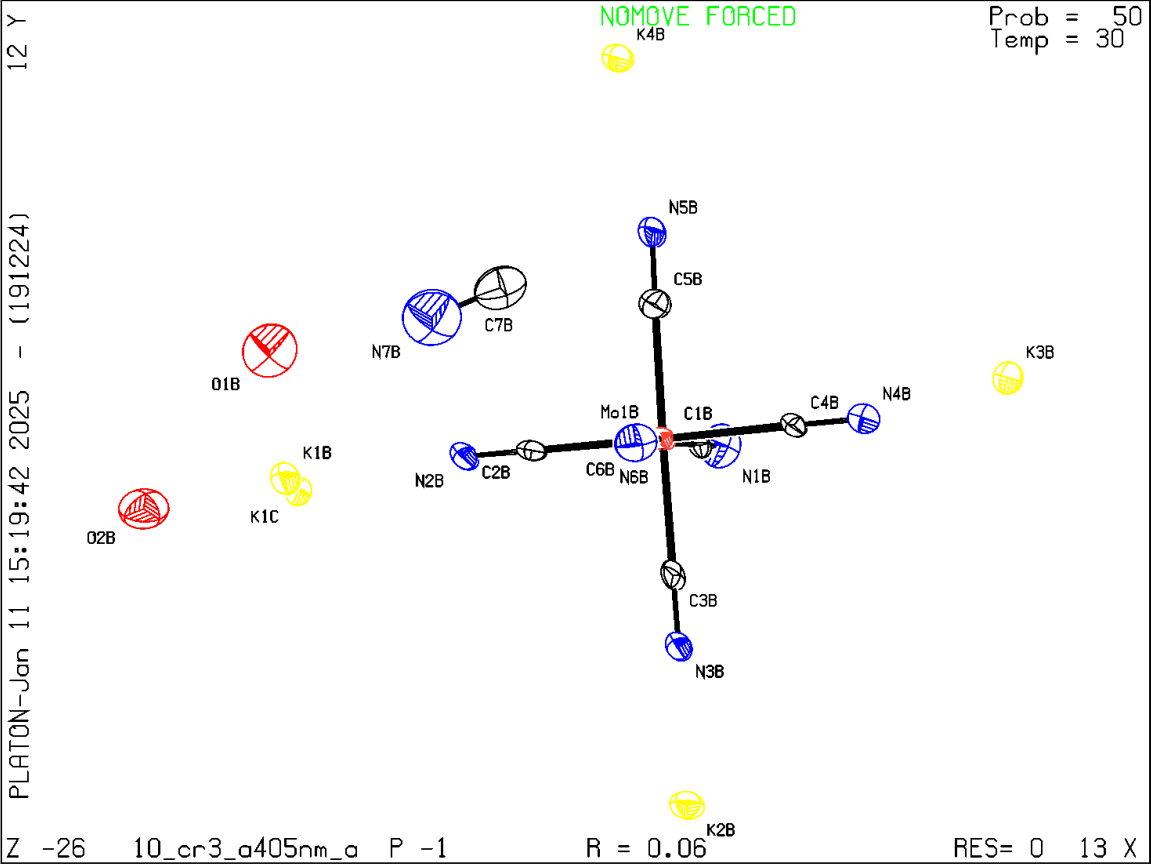

Supplement: Supplementary file 9 [file a4d5d29f60bc99cfc049a104.pdf]
