# Supplementary material for: Reversible single crystal photochemistry and spin state switching in a metal-cyanide complex
Source: Research Square preprint supplement (doi:10.21203/rs.3.rs-5611691/v1), 2025-03-20
Supplement: Supplementary file 4 [file 57dd21bbeff45d2f786874c6.pdf]

## checkCIF/PLATON report

Structure factors have been supplied for datablock(s) 9\_cr3\_pristine\_a

THIS REPORT IS FOR GUIDANCE ONLY. IF USED AS PART OF A REVIEW PROCEDURE FOR PUBLICATION, IT SHOULD NOT REPLACE THE EXPERTISE OF AN EXPERIENCED CRYSTALLOGRAPHIC REFEREE.

No syntax errors found.      CIF dictionary      Interpreting this report

### Datablock: 9\_cr3\_pristine\_a

---

Bond precision:    N- C = 0.0073 Å                      Wavelength=0.68890

Cell:                      a=8.9352 (10)                      b=9.2992 (9)                      c=9.7380 (16)  
                              alpha=86.993 (12)                      beta=82.116 (13)                      gamma=70.754 (9)

Temperature:    30 K

|                        | Calculated                                | Reported                         |
|------------------------|-------------------------------------------|----------------------------------|
| Volume                 | 756.67 (17)                               | 756.67 (17)                      |
| Space group            | P -1                                      | P -1                             |
| Hall group             | -P 1                                      | -P 1                             |
| Moiety formula         | C7 Mo N7, 0.182 (O2),<br>1.637 (O), 4 (K) | C7 K4 Mo N7 O1.637,<br>0.363 (O) |
| Sum formula            | C7 K4 Mo N7 O2                            | C7 K4 Mo N7 O2                   |
| Mr                     | 466.48                                    | 466.48                           |
| Dx, g cm <sup>-3</sup> | 2.047                                     | 2.047                            |
| Z                      | 2                                         | 2                                |
| Mu (mm <sup>-1</sup> ) | 1.797                                     | 1.797                            |
| F000                   | 450.0                                     | 450.0                            |
| F000'                  | 447.80                                    |                                  |
| h, k, lmax             | 12, 13, 13                                | 12, 12, 13                       |
| Nref                   | 4385                                      | 3975                             |
| Tmin, Tmax             | 0.937, 0.982                              | 0.998, 1.000                     |
| Tmin'                  | 0.931                                     |                                  |

Correction method= # Reported T Limits: Tmin=0.998 Tmax=1.000  
AbsCorr = EMPIRICAL

Data completeness= 0.906                      Theta (max)= 28.907

R(reflections)= 0.0579 ( 2615)

wR2(reflections)=  
0.1501 ( 3975)

S = 1.055

Npar= 200

---

The following ALERTS were generated. Each ALERT has the format

**test-name\_ALERT\_alert-type\_alert-level.**

Click on the hyperlinks for more details of the test.

---

 **Alert level A**

PLAT971\_ALERT\_2\_A Check Calcd Resid. Dens. 0.81Ang From MolA 4.51 eA-3

**Author Response: The residual density near molybdenum is due to partial photoinduced changes in the crystal structure caused by a strong synchrotron X-ray source.**

---

 **Alert level B**

PLAT097\_ALERT\_2\_B Large Reported Max. (Positive) Residual Density 4.81 eA-3

**Author Response: The residual density near molybdenum is due to partial photoinduced changes in the crystal structure caused by a strong synchrotron X-ray source.**

PLAT306\_ALERT\_2\_B Isolated Oxygen Atom (H-atoms Missing ?) ..... 01A Check

**Author Response: The water molecules in the structure are disordered, so we decided not to model the positions of the hydrogen atoms, since the refinement led to an un**

---

 **Alert level C**

DIFMX02\_ALERT\_1\_C The maximum difference density is > 0.1\*ZMAX\*0.75

The relevant atom site should be identified.

PLAT029\_ALERT\_3\_C \_diffrn\_measured\_fraction\_theta\_full value Low . 0.978 Why?

PLAT042\_ALERT\_1\_C Calc. and Reported MoietyFormula Strings Differ Please Check

Calc: C7 Mo N7, 0.182(O2), 1.637(O), 4(K)

Rep.: C7 K4 Mo N7 O1.637, 0.363(O)

PLAT094\_ALERT\_2\_C Ratio of Maximum / Minimum Residual Density .... 3.44 Report

PLAT213\_ALERT\_2\_C Atom C5A has ADP max/min Ratio ..... 3.9 prolat

PLAT220\_ALERT\_2\_C NonSolvent Resd 1 N Ueq(max)/Ueq(min) Range 3.9 Ratio

PLAT906\_ALERT\_3\_C Large K Value in the Analysis of Variance ..... 2.829 Check

PLAT911\_ALERT\_3\_C Missing FCF Refl Between Thmin & STh/L= 0.600 60 Report

|   |    |     |    |    |     |    |    |     |    |    |     |   |    |     |   |    |     |
|---|----|-----|----|----|-----|----|----|-----|----|----|-----|---|----|-----|---|----|-----|
| 2 | -6 | 5,  | 0  | 7  | 5,  | -1 | -6 | 6,  | 0  | -6 | 6,  | 1 | -6 | 6,  | 0 | -5 | 7,  |
| 1 | -5 | 7,  | -4 | 1  | 7,  | 6  | 1  | 7,  | -3 | 2  | 7,  | 6 | 2  | 7,  | 6 | 3  | 7,  |
| 6 | 4  | 7,  | -3 | 1  | 8,  | -2 | 2  | 8,  | -1 | 3  | 8,  | 2 | -3 | 9,  | 1 | -1 | 9,  |
| 2 | -1 | 9,  | 2  | 0  | 9,  | 5  | 1  | 9,  | 0  | 2  | 9,  | 1 | -2 | 10, | 2 | -2 | 10, |
| 3 | -2 | 10, | 0  | -1 | 10, | 1  | -1 | 10, | 2  | -1 | 10, | 3 | -1 | 10, | 4 | -1 | 10, |
| 0 | 0  | 10, | 1  | 0  | 10, | 2  | 0  | 10, | 3  | 0  | 10, | 4 | 0  | 10, | 0 | 1  | 10, |
| 2 | 1  | 10, | 3  | 1  | 10, | 4  | 1  | 10, | 0  | -3 | 11, | 1 | -3 | 11, | 0 | -2 | 11, |
| 1 | -2 | 11, | 2  | -2 | 11, | 3  | -2 | 11, | 0  | -1 | 11, | 1 | -1 | 11, | 2 | -1 | 11, |
| 3 | -1 | 11, | 0  | 0  | 11, | 1  | 0  | 11, | 2  | 0  | 11, | 3 | 0  | 11, | 4 | 0  | 11, |

|                   |                                        |                  |       |   |       |   |       |   |       |      |       |
|-------------------|----------------------------------------|------------------|-------|---|-------|---|-------|---|-------|------|-------|
| 1                 | 1 11,                                  | 2                | 1 11, | 3 | 1 11, | 4 | 1 11, | 3 | 2 11, | 4    | 2 11, |
| PLAT973_ALERT_2_C | Check Calcd Positive Resid. Density on | MolA             |       |   |       |   |       |   |       | 1.06 | eA-3  |
| PLAT975_ALERT_2_C | Check Calcd Resid. Dens.               | 0.84Ang From O1A | .     |   |       |   |       |   |       | 0.97 | eA-3  |
| PLAT975_ALERT_2_C | Check Calcd Resid. Dens.               | 0.61Ang From O2A | .     |   |       |   |       |   |       | 0.82 | eA-3  |

## Alert level G

ABSMU01\_ALERT\_1\_G Calculation of \_exptl\_absorpt\_correction\_mu  
not performed for this radiation type.

|                   |                                                             |               |
|-------------------|-------------------------------------------------------------|---------------|
| PLAT040_ALERT_1_G | No H-atoms in this Carbon Containing Compound ..            | Please Check  |
| PLAT178_ALERT_4_G | The CIF-Embedded .res File Contains SIMU Records            | 1 Report      |
| PLAT188_ALERT_3_G | A Non-default SIMU Restraint Value has been used            | 0.0010 Report |
| PLAT302_ALERT_4_G | Anion/Solvent/Minor-Residue Disorder (Resd 2)               | 100% Note     |
| PLAT302_ALERT_4_G | Anion/Solvent/Minor-Residue Disorder (Resd 4)               | 100% Note     |
| PLAT304_ALERT_4_G | Non-Integer Number of Atoms in ..... (Resd 2)               | 0.73 Check    |
| PLAT304_ALERT_4_G | Non-Integer Number of Atoms in ..... (Resd 4)               | 0.64 Check    |
| PLAT311_ALERT_2_G | Isolated Disordered Oxygen Atom (No H's ?) .....            | O2A Check     |
| PLAT790_ALERT_4_G | Centre of Gravity not Within Unit Cell: Resd. #             | 3 Note        |
|                   | O                                                           |               |
| PLAT790_ALERT_4_G | Centre of Gravity not Within Unit Cell: Resd. #             | 4 Note        |
|                   | O                                                           |               |
| PLAT790_ALERT_4_G | Centre of Gravity not Within Unit Cell: Resd. #             | 5 Note        |
|                   | K                                                           |               |
| PLAT790_ALERT_4_G | Centre of Gravity not Within Unit Cell: Resd. #             | 6 Note        |
|                   | K                                                           |               |
| PLAT802_ALERT_4_G | CIF Input Record(s) with more than 80 Characters            | 2 Info        |
| PLAT883_ALERT_1_G | Absent Datum for _atom_sites_solution_primary ..            | Please Do !   |
| PLAT912_ALERT_4_G | Missing # of FCF Reflections Above STh/L= 0.600             | 347 Note      |
| PLAT941_ALERT_3_G | Average HKL Measurement Multiplicity .....                  | 3.8 Low       |
| PLAT969_ALERT_5_G | The 'Henn et al.' R-Factor-gap value .....                  | 1.479 Note    |
|                   | Predicted wR2: Based on SigI**2 10.15 or SHELX Weight 14.23 |               |
| PLAT984_ALERT_1_G | The K-f' = 0.1940 Deviates from the B&C-Value               | 0.1927 Check  |
| PLAT984_ALERT_1_G | The Mo-f' = -1.8750 Deviates from the B&C-Value             | -1.8622 Check |
| PLAT985_ALERT_1_G | The K-f" = 0.2390 Deviates from the B&C-Value               | 0.2361 Check  |
| PLAT985_ALERT_1_G | The Mo-f" = 0.6620 Deviates from the B&C-Value              | 0.6534 Check  |

- 1 **ALERT level A** = Most likely a serious problem - resolve or explain  
2 **ALERT level B** = A potentially serious problem, consider carefully  
11 **ALERT level C** = Check. Ensure it is not caused by an omission or oversight  
22 **ALERT level G** = General information/check it is not something unexpected

- 9 ALERT type 1 CIF construction/syntax error, inconsistent or missing data  
10 ALERT type 2 Indicator that the structure model may be wrong or deficient  
5 ALERT type 3 Indicator that the structure quality may be low  
11 ALERT type 4 Improvement, methodology, query or suggestion  
1 ALERT type 5 Informative message, check

It is advisable to attempt to resolve as many as possible of the alerts in all categories. Often the minor alerts point to easily fixed oversights, errors and omissions in your CIF or refinement strategy, so attention to these fine details can be worthwhile. In order to resolve some of the more serious problems it may be necessary to carry out additional measurements or structure refinements. However, the purpose of your study may justify the reported deviations and the more serious of these should normally be commented upon in the discussion or experimental section of a paper or in the "special\_details" fields of the CIF. checkCIF was carefully designed to identify outliers and unusual parameters, but every test has its limitations and alerts that are not important in a particular case may appear. Conversely, the absence of alerts does not guarantee there are no aspects of the results needing attention. It is up to the individual to critically assess their own results and, if necessary, seek expert advice.

### **Publication of your CIF in IUCr journals**

A basic structural check has been run on your CIF. These basic checks will be run on all CIFs submitted for publication in IUCr journals (*Acta Crystallographica*, *Journal of Applied Crystallography*, *Journal of Synchrotron Radiation*); however, if you intend to submit to *Acta Crystallographica Section C* or *E* or *IUCrData*, you should make sure that full publication checks are run on the final version of your CIF prior to submission.

### **Publication of your CIF in other journals**

Please refer to the *Notes for Authors* of the relevant journal for any special instructions relating to CIF submission.
